# THE CREATION OF A NEGATIVE SLOPE CONDUCTANCE REGION BY THE ACTIVATION OF THE PERSISTENT SODIUM CURRENT PROLONGS NEAR-THRESHOLD SYNAPTIC POTENTIALS

Cesar C. Ceballos<sup>1,2</sup>, Antonio C. Roque<sup>2</sup> and Ricardo M. Leão<sup>1</sup>

<sup>1</sup>Department of Physiology, Ribeirão Preto Medical School, School of Medicine, University of São Paulo, Ribeirão Preto, Brazil, <sup>2</sup>Department of Physics, School of Philosophy, Sciences and Letters, University of São Paulo, Ribeirão Preto, Brazil

## ABSTRACT

A change of the input resistance ( $R_{in}$ ) of the neuron involves a change in the membrane conductances by opening and closing of ion channels. In passive membranes, i.e., membranes with only linear leak conductances, the increase or decrease of these conductances leads to a decrease or increase of the  $R_{in}$  and the membrane time constant ( $\tau_m$ ). However, the presence of subthreshold voltage dependent currents can produce non-linear effects generating deviations from this relationship, especially the contradictory effect of negative conductances, as produced by the sodium-persistent current ( $I_{NaP}$ ), on the  $R_{in}$ . In this work we aimed to analyze experimentally and theoretically the impact of the negative conductance produced by  $I_{NaP}$  on  $R_{in}$ . Experiments of whole-cell patch-clamp conducted in CA1 hippocampus pyramidal cells from brain slices showed a paradoxical voltage-dependent decrease of the  $R_{in}$  and the  $\tau_m$  in subthreshold membrane potentials close to the firing threshold after the perfusion with TTX, which inhibits  $I_{NaP}$ . This effect is postulated to be a result of the negative slope conductance in the subthreshold region produced by this conductance. The analysis of the experimental data, together with simulations found that the slope conductance of  $I_{NaP}$  is negative for subthreshold membrane potentials and its magnitude is voltage dependent in the same range observed for the voltage-dependence of  $R_{in}$  and  $\tau_m$ . The injection of an artificial  $I_{NaP}$  using dynamic-clamp in the presence of TTX restored the  $R_{in}$  and  $\tau_m$  to its original values. Additionally the injection of an artificial leak current with a negative conductance in the presence of TTX restored the  $R_{in}$  and  $\tau_m$  as the artificial  $I_{NaP}$  did. On the other hand, the injection of an artificial leak current

with a positive conductance in the presence of TTX had no effect on the  $R_{in}$  and  $\tau_m$ . We conclude that  $I_{NaP}$  increases the  $R_{in}$  and  $\tau_m$  by the negative slope conductance observed in its non-monotonic I-V relationship. These results demonstrate that the effect of  $I_{NaP}$  on  $R_{in}$  and  $\tau_m$  is stronger in potentials near the firing threshold, which could potentiate the temporal summation of the EPSPs increasing their temporal integration and facilitating action potential firing. Because of its negative slope conductance,  $I_{NaP}$  is more effective in increasing excitability near threshold than a depolarizing leak current.

## INTRODUCTION

The membrane input resistance ( $R_{in}$ ) and membrane time constant ( $\tau_m$ ) are traditionally view, based on the cable theory, as a result of the passive non-voltage dependent leak or background channels (Enyedi et al. 2010, Dallérac et al. 2014, Du et al. 2016), and not depending on the voltage-dependent channels (Koch 1998). However, the electrical behavior of neurons is never purely passive because most neurons also express voltage dependent currents activated at subthreshold membrane potentials making  $R_{in}$  and  $\tau_m$  voltage-dependent (Surges et al. 2004, Nisenbaum et al. 1995, Klink et al 1997, Fernandez et al. 2015, Yamada-Hanff & Bean, 2015). Thus, the classical cable theory is insufficient to explain the subthreshold membrane properties of the soma.

The persistent sodium current ( $I_{NaP}$ ) is a subthreshold non-inactivating voltage dependent current which is expressed in several neuronal types (Stafstrom et al., 1985; Crill, 1996; French et al., 1999; Magistretti et al., 1999; Del Negro et al., 2002; Leão et al., 2005, 2012).  $I_{NaP}$  is rapidly activated and deactivated ( $\tau < 250 \mu s$ , Carter et al. 2012), but has a slow inactivation, remaining active for hundreds of milliseconds (French et al. 1990).  $I_{NaP}$  is not generated by a different type of  $Na_v$  subunit, but depends on the interaction of the  $Na_v$  alpha subunit with beta subunits (Qu et al., 2001; Aman et al., 2009).  $I_{NaP}$  affects substantially the neuronal excitability boosting depolarization near the threshold and producing spontaneous firing (Leao et al., 2012, Raman et al 2000, Pennartz et al 1997) and mutations in  $Na_v$  subunits increasing the expression of  $I_{NaP}$  are related to pathologies as epilepsies (reviewed by Stafstrom, 2007). The voltage-dependence of  $I_{NaP}$  is similar to the classical voltage dependent sodium current, with a non-monotonic relationship originated from the interaction between its channel activation kinetics and its reversal potential (Izhikevich 2007, Ghigliazza & Holmes, 2004). This implies that the current-voltage (IV) relationship of  $I_{NaP}$  displays both a positive and a negative slope conductance, which are determined by  $dI/dV$  at the different points of the curve, being the negative conductance expressed at the activation phase of the curve (Izhikevich 2007, Stafstrom et al., 1982, Yamada-Hanff & Bean 2015, Ghigliazza & Holmes, 2004). Negative slope conductances increase  $R_{in}$  and  $\tau_m$ , despite to the increased channel conductance (Fernandez et al 2015) and experimental evidence shows that  $I_{NaP}$  increases  $R_{in}$  and  $\tau_m$  in its negative slope

conductance region (Wilson 2005, Haj-Dahmane et al 1996, Yamada-Hanff et al 2013, Fernandez et al 2015, Economo et al 2014, Yamada-Hanff et al 2015, Jacobson et al 2005, Yaron-Jakoubovitch et al 2008, Boehlen 2012, Waters et al 2006, Buchanan et al 1992).

For more than three decades it is known that the amplitude and duration of excitatory post-synaptic potentials (EPSPs) are voltage dependent, and that depolarizing the membrane potential to values close the action potential threshold amplifies its amplitude and prolongs its decay phase (Deisz et al. 1991, Thomson et al. 1988, Stafstrom et al. 1985). In cortical and hippocampal pyramidal cells, these effects are mediated mainly by  $I_{NaP}$  (Stuart et al 1995; Fricker et al 2000). The mechanism for the amplification of the EPSP amplitude is attributed to the fast activation of the  $I_{NaP}$  that boosts depolarization and increases  $R_{in}$  by its negative slope conductance (Yamada-Hanff & Bean 2015). However no satisfactory explanation has been provided for the prolongation of the EPSP. From an intuitive point of view, the slow inactivation of  $I_{NaP}$  could explain the longer duration of EPSPs near threshold. However, the non-inactivating  $I_h$  current shortens the duration of EPSP (Magee 1988). Both,  $I_{NaP}$  and  $I_h$  are depolarizing and non-inactivating currents, suggesting that neither aspect is responsible for the EPSP prolongation. Furthermore,  $I_{NaP}$  has a fast deactivation whereas  $I_h$  has slow deactivation, strongly suggesting that channel deactivation kinetics is not involved in the prolongation of EPSPs. Recently, Yamada-Hanff & Bean (2015) have shown that  $I_{NaP}$  increases the  $\tau_m$  whereas  $I_h$  decreases the  $\tau_m$ , and that the increase or decrease of  $\tau_m$  matches with regions of negative and positive slope conductance of the IV curves, respectively. These observations suggest that the mechanism underlying the prolongation of near threshold EPSP is possibly related to the negative slope conductance produced by  $I_{NaP}$  in the subthreshold membrane potentials.

In this work we aimed to establish the biophysical mechanisms underlying the prolongation of the EPSP decay in CA1 pyramidal cells. For this we develop a new analytical solution for the steady-state slope conductance of non-inactivating voltage dependent currents in order to gain some insight on the mechanisms by which  $I_{NaP}$  activation increases  $R_{in}$  and  $\tau_m$ . Mathematical, computational and experimental approaches were used to establish the mechanism of the increasing  $R_{in}$  and  $\tau_m$  by the negative slope conductance of the  $I_{NaP}$ . To further investigate the relationship between  $R_{in}$ ,  $\tau_m$  and negative slope conductance in real neurons, we applied an artificial  $I_{NaP}$  to hippocampal pyramidal cells using dynamic

clamp. Finally, we investigate the effect of a pure negative linear conductance on the  $R_{in}$ ,  $\tau_m$  and the prolongation of EPSPs. Our hypothesis was that the ability for the  $I_{NaP}$  to increase  $R_{in}$ ,  $\tau_m$  and duration of EPSPs is related only to its negative slope conductance and not dependent on the channel kinetics or ionic conductance. Our experimental and theoretical results show that the negative conductance of  $I_{NaP}$  is enough to increase the  $\tau_m$  and to prolong the decay phase of EPSPs.

## METHODS

### *Hippocampal slices and electrophysiology*

The experimental procedures were approved by the Ethics Committee on Animal Experimentation (CETEA) of the Medical School of the University of Sao Paulo at Ribeirao Preto (FMRP-USP). Male Wistar rats (P18 to P22) were anesthetized with isoflurane and decapitated and their brains removed. Coronal slices (300  $\mu$ m thickness) containing the dorsal hippocampus were obtained with a vibratome (Vibratome 1000 Plus) in an ice-cold solution containing (mM): 87 NaCl, 2.5 KCl, 1.25  $\text{NaH}_2\text{PO}_4$ , 25  $\text{NaHCO}_3$ , 0.2  $\text{CaCl}_2$ , 7  $\text{MgCl}_2$ , 25 dextrose and 75 sucrose, pH 7.4 when oxygenated with 95%  $\text{O}_2$ /5%  $\text{CO}_2$ . The slices were incubated in an artificial cerebrospinal solution (aCSF) during 45 min at 35°C and thereafter at room temperature (25°C). The aCSF contained (mM): 120 NaCl, 2.5 KCl, 1.25  $\text{NaH}_2\text{PO}_4$ , 25  $\text{NaHCO}_3$ , 2  $\text{CaCl}_2$ , 1  $\text{MgCl}_2$  and 20 dextrose, pH 7.4 when oxygenated with 95%  $\text{O}_2$ /5%  $\text{CO}_2$  (osmolality  $\sim$ 310 mOsmol/kg  $\text{H}_2\text{O}$ ). CA1 pyramidal cells (PYR) were visualized with a microscope (Olympus BX51W) equipped with DIC-IR optics using a 40x water immersion objective. Recordings were obtained with borosilicate microelectrodes presenting a resistance between 4-6 M $\Omega$  when filled with the internal solution (mM): 138 K-gluconate, 8 KCl, 10 Na-phosphocreatine, 10 HEPES, 0.5 EGTA, 4 Mg-ATP, 0.3 Na-GTP, pH 7.4 adjusted with KOH and 295 mOsmol/kg  $\text{H}_2\text{O}$ .

Pyramidal cells were identified based on the location on the CA1 pyramidal layer, firing behavior and the triangular shape of the soma. Whole-cell patch-clamp recordings were conducted in a controlled temperature around 33-36 °C using an in-line heater (Scientifica). Series resistance was monitored through the experiments from the size of the capacitive transient in response to a 5 mV voltage step in voltage clamp mode. Recordings with access resistance larger than 20 M $\Omega$  were discarded. Series resistance was

compensated at 80%. All the recordings were done in the presence of the GABA<sub>A</sub> antagonist picrotoxin (PTX, 20 μM). Tetrodotoxin (TTX, 100 nM) was perfused to block the persistent sodium currents, when indicated.

Data were acquired using PATCHMASTER (HEKA) at a 40 KHz rate, filtered with a low pass filter (Bessel, 3 kHz) using an EPC 10 amplifier (HEKA). Drugs were prepared in aliquots 1000 x concentrated and diluted into the perfusion solution in the day of the experiment. PTX was obtained from Sigma and TTX was obtained from Alomone Labs.

### Dynamic-clamp

Our dynamic-clamp was implemented in a HP notebook running Linux with RTAI (RealTime Application Interface for Linux). Comedi library packages allowed the control of a DAQ board (Texas Instrument) plugged to the EPC 10 amplifier. Codes were written in C and the equations were solved using first order exponential Euler method with 50 μs steps (Dagostin al, 2015).

Dynamic-clamp recordings were done recording the membrane potential and injecting current onto the cell in the whole-cell current clamp mode through the same pipette. An artificial  $I_{NaP}$  was injected in neurons bathed in standard aCSF perfusion and in aCSF with TTX. Artificial  $I_{NaP}$  was calculated and injected in real time using the equations:

$$I_{NaP} = \bar{g}_{NaP} A_{NaP}(V, t)(V - E_{NaP}) \quad (1)$$

$$\frac{dA_{NaP}(V, t)}{dt} = \frac{A_{NaP}^{\infty} - A_{NaP}(V, t)}{\tau} \quad (2)$$

$$A_{NaP}^{\infty} = \frac{1}{1 + e^{(V - V_{1/2})/k}}, \quad (3)$$

where the maximum conductance  $\bar{g}_{NaP} = 5$  nS, the reversal potential  $E_{Na} = +50$  mV and the activation time constant  $\tau = 2$  ms. The parameters of the steady state activation variable  $A_{NaP}^{\infty}$  were fitted to reproduce the

persistent sodium channel kinetics ( $V_{1/2} = -50$  mV,  $k = 6$ ) in agreement with experimental data from Yamada-Hanff et al. (2015). Membrane potential and currents were sampled at a 20 KHz rate. Membrane potential was recorded and corrected on-line for the liquid junction potential calculated in 10 mV after the equations were solved.

Artificial linear conductances were simulated using dynamic clamp. We tested two linear conductances: one with a positive conductance and the other with a negative conductance (Bose et al. 2014; Fernandez et al. 2015), following the equation  $I = \bar{g}(V - E_{rev})$  where  $\bar{g}$  is the maximum conductance in nS and  $E_{rev}$  is the reversal potential in mV. For the current with positive conductance we used  $\bar{g} = 0.5$  and  $E_{rev} = 50$ , and for the current with negative conductance we used  $\bar{g} = -4$  and  $E_{rev} = -80$ . These conductance values were chosen from the NaP slope conductance and chord conductance curves for the membrane potential -70 mV (see Figure 1B and Figure 1C). In the experiments when the negative conductance was injected, we restricted the current injection to the range between -80 mV and -60 mV in order to prevent instabilities.

## Data analysis

Measured liquid junction potential was of 10 mV and was corrected off-line. Experiments in the voltage-clamp mode were conducted at a holding potential of -80 mV. In order to isolate the  $I_{NaP}$ , voltage ramps were applied from -90 mV to -30 mV for 4 seconds.  $I_{NaP}$  was obtained by applying TTX (100 nM) and subtracting the currents produced by the ramps before and after TTX.

Input resistance was measured in current-clamp mode analyzing voltage-current (VI) relationships, before and after application of TTX. VI curves were obtained injecting 1 s current pulses with +10 pA steps from -400 pA to +400 pA. The steady state potential was measured during the last 100 ms of the pulse. The input resistance for each membrane potential was determined from the slope of the linear regression using 3 consecutive steady state potentials from the VI curve. Membrane time constant was measured in the current-clamp mode by fitting a single exponential to the first 100 ms of the voltage change in response to a small (+20 pA) current injection. When measuring the input resistance and the membrane time constant,

small current pulses were injected in order to maintain  $\Delta V$  as minimum as possible. In order to determine the effect of the  $I_{NaP}$  on the EPSP shape (amplitude and duration), artificial EPSC (aEPSC) were injected through the recording pipette while the membrane potential was changed. aEPSCs were built using two consecutive current ramps, (2 ms rising and 5 ms decay). The maximum current amplitude (200 pA) was set in order to obtain  $\sim 5$  mV aEPSPs at -90 mV.

We measured the amplitude (mV) and the area under the aEPSP (mV\*ms) in order to determine the amplification in the amplitude and the decay time of aEPSPs by  $I_{NaP}$ . Area normalized by the amplitude was also determined to isolate the prolongation of the aEPSP decay. Due to the variability of the shape of the aEPSPs near the firing threshold, we were unable to fit the aEPSP decay using exponential functions, and for this reason we decided to measure the area of the aEPSP to estimate its decay.

Data were analyzed using algorithms written in Igor Pro (Wavemetrics) and Matlab. Data were presented as mean  $\pm$  SEM. Means were statistically compared using One way repeated measures ANOVA, Two way repeated measures ANOVA and linear regression in GraphPad Prism (GraphPad Software, La Jolla, CA). Statistical significance was set below  $p = 0.05$ .

## Neuron model

We considered a single compartment model neuron with only linear ( $I_L$ ) and non-inactivating voltage dependent currents ( $I_{NI,j}$ ,  $j=1, \dots, n$ ), where  $n$  is the number of different non-inactivating currents. The membrane voltage is described by the equation

$$C \frac{dV}{dt} = - \sum_j I_{NI,j} - I_L + I(t), \quad (4)$$

where  $C$  is the membrane capacitance and  $I(t)$  is the injected current. In the steady state this equation implies

$$I = \sum_j I_{NI,j} + I_L. \quad (5)$$

Using the Hodgkin-Huxley formalism to represent the ionic currents in the steady state one gets



$$I = \sum_j \bar{g}_{NI,j} (A_{NI,j}^{\infty})^{n_j} (V - E_{NI,j}) + \bar{g}_L (V - E_L), \quad (6)$$

where  $\bar{g}_{NI,j}$ ,  $A_{NI,j}^{\infty}$  and  $E_{NI,j}$  represent, respectively, the maximum conductance, the steady-state activation variable and the reversal potential of the  $j$ th non-inactivating current type.  $\bar{g}_L$  and  $E_L$  are, respectively, the maximum conductance and the reversal potential of the linear current, and  $n_j$  are natural numbers introduced to fit the experimental data. The activation variables are represented by Boltzmann terms like the one in equation (3). In this equation,  $V_{1/2}$  is the membrane potential at which  $A_{NI,j}^{\infty} = 0.5$  and  $k$  is the slope factor, which is a real number whose magnitude represents the slope of the sigmoid activation curve. Positive  $k$  means that the current is activated by hyperpolarization and negative  $k$  means that the current is activated by depolarization.

#### *Slope and chord conductance/resistance*

The infinitesimal or differential definition of the input conductance in the steady state  $G_{in}$  is

$$G_{in} = \frac{dI}{dV_{ss}}, \quad (7)$$

where  $V_{ss}$  is the steady-state membrane potential. This definition is commonly known as the slope conductance, since it corresponds to the slope of the steady-state  $I$ - $V$  plot. The slope conductance at the steady state of a non-inactivating voltage-dependent current is obtained by differentiating its current equation

$$G_{NI} = \frac{dI_{NI}}{dV_{ss}} = g_{NI} * (A_{NI}^{\infty})^n + (V - E_{NI}) * \frac{d(g_{NI} * (A_{NI}^{\infty})^n)}{dV_{ss}} \quad (8)$$

Splitting the equation (8) in two terms

$$G_{NI} = G_{NI}^{Pas} + G_{NI}^{Der} \quad (9)$$

Where  $G_{NI}^{Der}$  is defined as the derivative term of the slope conductance and  $G_{NI}^{Pas}$  is defined as the passive term of the slope conductance. Notice that  $G_{NI}^{Pas}$  corresponds to the so called chord conductance or to the biophysical conductance of the channel, so that  $I_{NI} = G_{NI}^{Pas} * (V - E_{NI})$ .  $G_{NI}^{Pas}$  is always positive, whereas  $G_{NI}^{Der}$  could be positive or negative.

The input conductance of a membrane that only contains ionic linear currents ( $I_L$ ) and ionic non-inactivating voltage dependent currents ( $I_{NI}$ ) is obtained differentiating the equation (6) with respect to  $V$ :

$$G_{in} = g_L + \sum G_{NI} \quad (10)$$

Thus, the input conductance in the steady state corresponds to the sum of the slope conductance of each ionic current in the steady state. Since the slope conductance characterizes the response of the membrane current to small changes in the membrane potential, its inverse is the slope resistance, or input resistance:

$$R_{in} = \frac{1}{G_{in}}. \quad (11)$$

Both the input resistance or the slope conductance can be used to characterize membranes and/or single channels. However, these definitions, although operationally straightforward, do not meet the criteria for an Ohmic conductance. From the viewpoint of Ohm's law, a more appropriate definition of the channel conductance is the one in which the conductance at a point on the steady-state  $i$ - $V$  trajectory is defined by the slope of a straight line connecting that point with the reversal potential. This conductance, typically referred to as the *chord* conductance, is defined on the basis of Ohm's law as

$$g_{chord} = \frac{I}{V - E_{rev}}. \quad (12)$$

So, the chord conductance corresponds to the biophysical conductance of the channel. Slope conductance and chord conductance are the same for all voltage only when the I-V curve is a straight line, i.e, when the current is linear or passive, like produced by leak channels.

### Membrane time constant

In a membrane containing only linear currents, the membrane equation can be written as

$$C \frac{dV}{dt} = -G_T (V - E_T) + I(t), \quad (13)$$

where  $G_T = \sum_k \bar{g}_{L,k}$  and  $E_T = \sum_k \bar{g}_{L,k} E_{rev,k} / \sum_k \bar{g}_{L,k}$  ( $k$  is the index for the different linear currents).

The time evolution of  $V(t)$  for a membrane with linear currents only is described by the following equation (Koch 1999, Sterratt et al. 2011):

$$V(t) = \frac{I}{\sum_k \bar{g}_{L,k}} (1 - e^{-t/\tau}) + V_0, \quad (14)$$

where  $V_0$  satisfies the equation  $\sum_k \bar{g}_{L,k} (V_0 - E_{rev,k}) = 0$ . The membrane time constant  $\tau$  in equation (14)

is defined as

$$\tau = \frac{C}{\sum_k \bar{g}_{L,k}}. \quad (15)$$

The single compartment was a cylinder with length and basis diameter 70  $\mu\text{m}$ . The maximum conductance and reversal potential of the  $I_{NaP}$  current were, respectively,  $\bar{g}_{NaP} = 5$  nS and  $E_{Na} = 50$  mV. The maximum conductance and reversal potential of the  $I_L$  current were, respectively,  $\bar{g}_L = 10$  nS and  $E_L = -90$  mV. Simulations were run both in NEURON and MATLAB.

## RESULTS

### The negative slope conductance of $I_{NaP}$ predicts an increase in $\tau_m$ by increasing the $R_{in}$

First we show analytically how an ohmic leak current and  $I_{NaP}$  determine  $R_{in}$  and  $\tau_m$ .  $I_{NaP}$  has a fast activation kinetics when compared with the membrane  $\tau_m$ , i.e., the channel time constant ( $\tau_{NaP}$ ) is much faster than  $\tau_m$ , ( $\tau_{NaP} \ll \tau_m$ ). Since the  $I_{NaP}$  activation kinetics is almost instantaneous (Carter et al., 2012), its steady state slope conductance ( $G_{NaP}$ ) equals its instantaneous slope conductance. Thus, it is possible to rewrite the  $I_{NaP}$  current equation (1) as a linear current with a slope conductance equal to  $G_{NaP}$  (see Fig 1A). So that;

$$I_{NaP} = G_{NaP} * (V - E'_{rev}) \quad (16)$$

where the new reversal potential  $E'_{rev}$  is now voltage dependent, i.e.,  $E'_{rev} = E'_{rev}(V)$ . However, if a small current  $\Delta I$  is injected, sufficiently small to assume that  $G_{NaP}(V) = G_{NaP}(V_{ini})$  and  $E'_{rev}(V) = E'_{rev}(V_{ini})$ , in other words, both  $G_{NaP}$  and  $E'_{rev}$  don't change and are independent of the membrane potential and time, so;

$$I_{NaP} = G_{NaP}(V_{ini}) * (V - E'_{rev}(V_{ini})) \quad (17)$$

what now has the format of an ohmic leak current. Thus,  $I_{NaP}$  behaves as a linear current when  $\Delta I$  is very small, and now its chord conductance is equivalent to  $G_{NaP}$ . Thus, the time evolution of  $V = V(t)$  for a membrane with a linear leak current and  $I_{NaP}$  with fast activation follows equation 14, and  $\tau_m$  is defined as in equation 15 (see Methods), where

$$G_T = g_{Leak} + G_{NaP} \quad (18)$$

summarizing, the contribution of  $I_{NaP}$  to the  $\tau_m$  is via its slope conductance  $G_{NaP}$ . So that, the  $I_{NaP}$  negative slope conductance increases  $\tau_m$  decreasing  $G_T$ , meanwhile the linear currents decrease  $\tau_m$  increasing  $G_T$ .

Figure 1 shows computational simulations with a single compartment neuron containing a linear current and  $I_{NaP}$ . Figure 1B and 1C show that both voltage change and voltage rise rate are dependent to membrane potential, being bigger and slower as membrane potential depolarizes. Figure 1D and 1E show that  $R_{in}$  and  $\tau_m$  are voltage dependent and increase with depolarization. When we correlate  $R_{in}$  with  $\tau_m$  for all the membrane potentials, it is clear that  $\tau_m$  is directly proportional to  $R_{in}$  (Figure 1F). This result predicts that the mathematical relation  $\tau_m = C * R_{in}$  is valid for both a passive membrane (only expressing leak channels) and a membrane containing leak and NaP channels. In the next sections we validate our predictions through experimental observations.

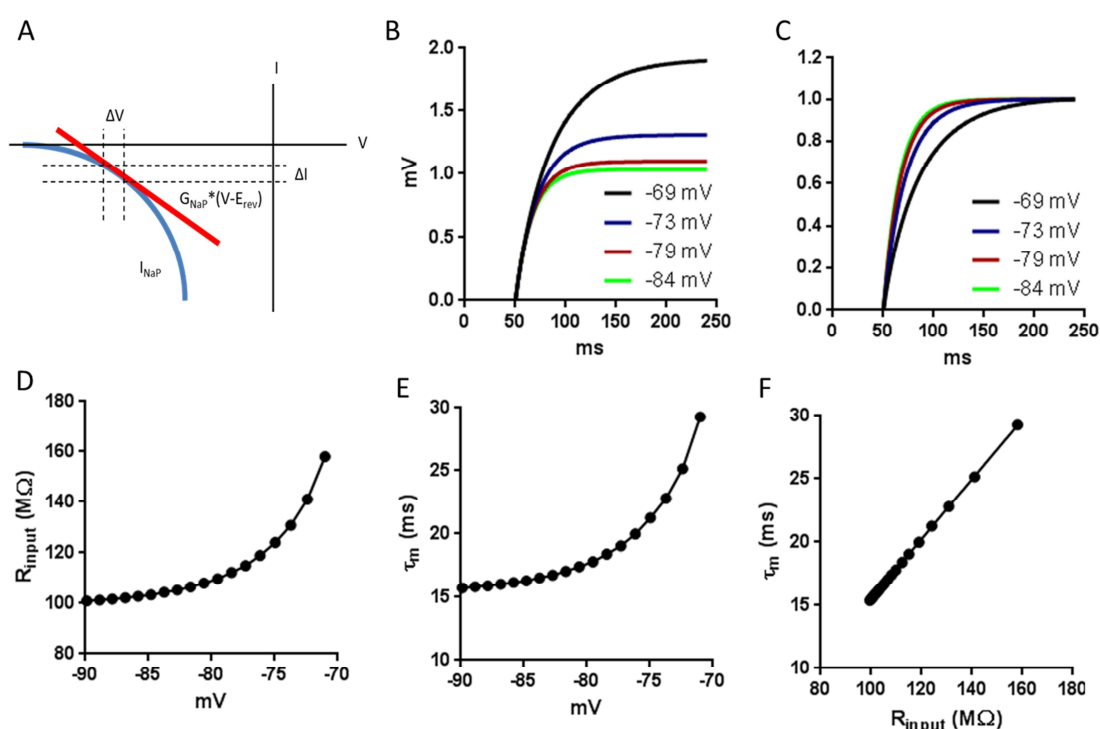

**Fig 1.** Computational simulations of voltage dependence of  $R_{in}$  and  $\tau_m$ . **A.** Approximation of instantaneous IV curve of  $I_{NaP}$  (blue) using a linear negative conductance (red) within the region limited by the dotted lines. **B.** Voltage dependence of membrane potential changes in response to a current of 10 pA **C.** Voltage dependence of the rise time of the responses in B. The graphs are normalized to the maximal response. **D.**

Plot of the voltage dependence of  $R_{in}$ . E. Plot of the voltage dependence of  $\tau_m$ . F. Correlation of  $\tau_m$  vs  $R_{in}$ .  $R^2 = 1$ .

### $I_{NaP}$ prolongs EPSP decay in a neuron model

In order to gain some insight about how  $I_{NaP}$  shapes the EPSP and the role of the activation and deactivation kinetics of  $I_{NaP}$ , we conducted computational simulations of  $I_{NaP}$  and EPSPs. Figure 2A shows examples of an EPSC produced by a triangular current (shown below) in the absence and in the presence of  $I_{NaP}$ , with 2 activation time constants. Figure 2B shows that in the presence of  $I_{NaP}$  with fast activation ( $\tau_{act} = 0.1$  ms), the EPSP amplitude is increased with membrane potential depolarization. In contrast, Figure 2C shows that in the presence of  $I_{NaP}$  with slow activation ( $\tau_{act} = 100$  ms), the EPSP amplitude decreases with depolarization of the membrane potential. Figure 2D shows  $I_{NaP}$  with its real fast activation and deactivation values (Carter et al 2012) ( $\tau = 0.1$  ms), increases EPSP area in a voltage dependent manner. These simulations showed that  $I_{NaP}$  both amplifies and slows down EPSPs, and that a fast activation is essential for its amplification and that even with a fast deactivation  $I_{NaP}$  can prolong the EPSP.

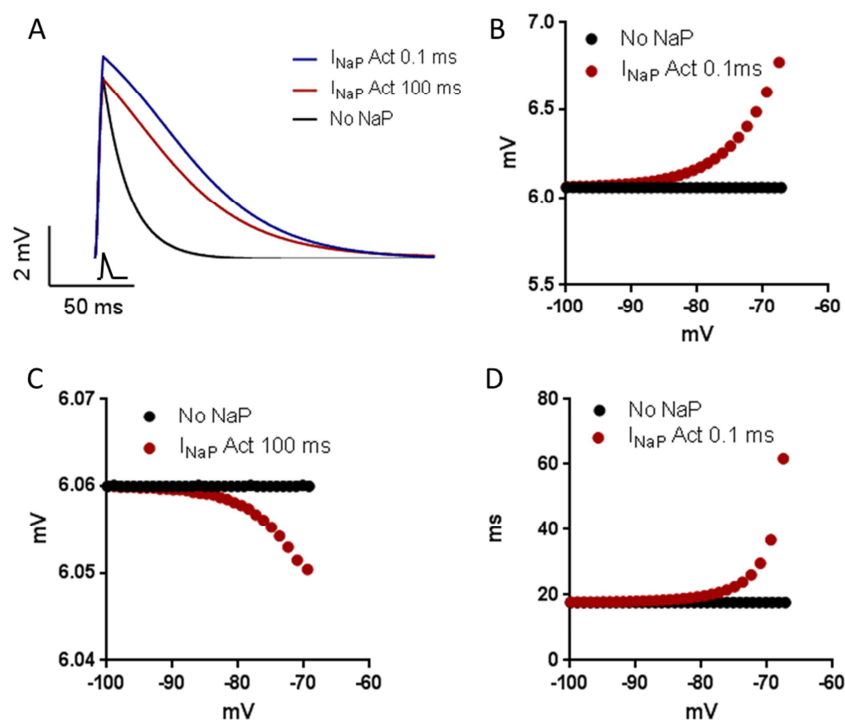

**Figure 2. A. EPSP representative traces obtained from computational simulations for  $I_{\text{Nap}}$  with fast activation ( $\tau_{\text{act}} = 0.1$  ms) and slow activation ( $\tau_{\text{act}} = 100$  ms).  $V = -67$  mV. aEPSC is drawn below the trace. B. Comparing EPSP amplitude for only linear current and with  $I_{\text{Nap}}$  with fast activation ( $\tau_{\text{act}} = 0.1$  ms) for different membrane potentials. C. Comparing EPSP amplitude for only linear current and with  $I_{\text{Nap}}$  with slow activation ( $\tau_{\text{act}} = 100$  ms) for different membrane potentials. D. EPSP area normalized by the amplitude with  $I_{\text{Nap}}$  fast activation and deactivation ( $\tau = 0.1$  ms)**

### **$G_{\text{NaP}}$ is composed mainly by its derivative component**

Hippocampal CA1 pyramidal cells express  $I_{\text{NaP}}$  and this current produces a region of negative slope conductance (Yamada-Hanff & Bean, 2015; French et al., 1999; Carter et al 2012) as can be seen in figure 3A. Application of a slow ramp (15 mV/s) produced an inward current which start to develop approximately at  $-85$  mV and peaked around  $-40$  mV. This current was abolished by TTX (100 nM) and the TTX-sensitive current had a peak of  $-537 \pm 42$  pA at the potential of  $-40$  mV. Assuming a calculated sodium reversal potential  $E_{\text{Na}} = 70$  mV, we calculated the NaP chord conductance ( $g_{\text{Nap}}$ ) and it was  $4.9 \pm 0.4$  nS at  $-40$  mV.  $I_{\text{NaP}}$  had a half-activation potential of  $-55.6 \pm 0.9$  mV and a slope factor of  $6.2 \pm 0.4$  mV ( $n = 10$ , Figure 3A), in line with previous reports (Yamada-Hanff & Bean, 2015, Carter et al 2012).

We then measured  $G_{\text{Nap}}$  by the first derivative of the current ( $dI/dV$ ) and accordingly found that it is negative and voltage dependent, increasing with depolarization ( $p = 0.0008$ ; One way repeated measures ANOVA; figure 3B). On the other hand, the chord conductance  $g_{\text{Nap}}$  is positive and equally voltage dependent, ( $p = 0.0045$ ; One way repeated measures ANOVA; figure 3C). But when we measured the derivative term  $G_{\text{Nap}}^{\text{Der}}$ , using equation 9, we found that it is also negative and voltage dependent, increasing with depolarization ( $p = 0.0003$ ; One way repeated measures ANOVA) (Figure 3D). Figure 3E summarizes the absolute values of  $G_{\text{Nap}}$ ,  $g_{\text{Nap}}$  and  $G_{\text{Nap}}^{\text{Der}}$  at different potentials showing that the major contribution of  $G_{\text{Nap}}$  comes mostly from the  $G_{\text{Nap}}^{\text{Der}}$ .

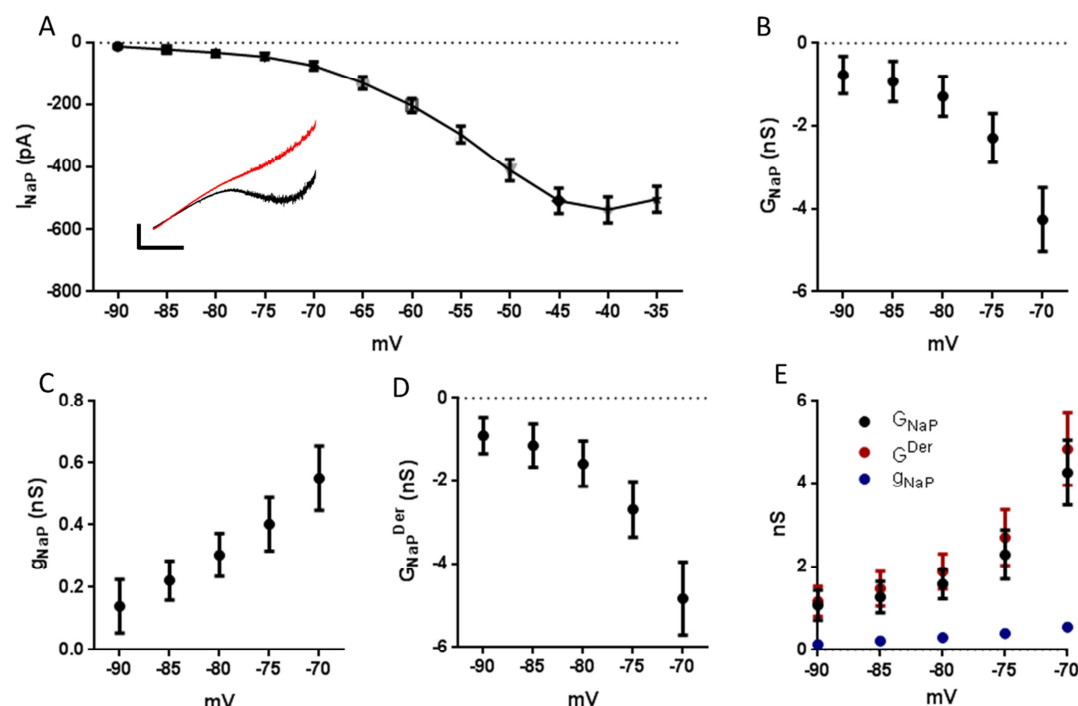

**Fig 3. A.** Average for I-V curves of persistent sodium current (I<sub>NaP</sub>) (n = 10) obtained by the subtraction of currents elicited by slow ramp command in a control (black) situation and after the perfusion with TTX (red). Inset. Representative traces. **B.** I<sub>NaP</sub> slope conductance (G<sub>NaP</sub>) determined from I-V curves in A (n = 9). **C.** I<sub>NaP</sub> chord conductance (g<sub>NaP</sub>) (n = 10). **D.** Derivative term of the slope conductance (G<sub>NaP</sub><sup>Der</sup>) obtained subtracting G<sub>NaP</sub> from g<sub>NaP</sub> (n = 9). **E.** Summary of absolute values of G<sub>NaP</sub>, g<sub>NaP</sub> and G<sub>NaP</sub><sup>Der</sup> from B, C and D.

### The negative slope conductance of I<sub>NaP</sub> is sufficient to increase the R<sub>in</sub>

The progressive activation of I<sub>NaP</sub> during a ramp depolarization potentiates the depolarization of the membrane as can be seen in figure 4A, which is blocked by TTX (100 nM). In accordance to our theoretical prediction and to previous observations (Economo et al 2014, Yamada-Hanff et al 2015), R<sub>in</sub> measured in current clamp (Figure 4B) is voltage dependent before and after TTX application. However, TTX decreases significantly the voltage-dependence of R<sub>in</sub> (p<0.0001 Two way repeated measures ANOVA n = 6), by reducing the voltage effect produced by the more depolarized potentials (-75 and -70 mV, p<0.05 Tukey's multiple comparison test). Since the mean resting membrane potential (RMP) was -78.3 ± 1.1 mV, these



results show that the effect of  $I_{NaP}$  on  $R_{in}$  is strong only for potentials above the RMP. Similar results were obtained in voltage-clamp (not shown).

To demonstrate that TTX decreases the  $R_{in}$  by inhibiting of the  $I_{NaP}$  negative slope conductance we conducted experiments with TTX and applied to the neuron an artificial  $I_{NaP}$  ( $aI_{NaP}$ ) using dynamic-clamp. Figure 4B shows that  $aI_{NaP}$  restores the voltage dependency of  $R_{in}$  after TTX (Two way repeated measures ANOVA,  $n = 6$ ), by increasing the effect of more positive potentials (-75 mV Tukey's multiple comparison test).

To confirm that the ability for  $I_{NaP}$  to increase  $R_{in}$  is related to its negative slope conductance, we injected artificial linear currents in pyramidal cells using dynamic clamp. We then tested two linear currents: One with a positive conductance and the other with a negative conductance. Where the current with positive conductance represents  $g_{NaP}$  ( $ag_{NaP}$ ), meanwhile the current with negative conductance represents  $G_{NaP}$  ( $aG_{NaP}$ ) (figure 4E).

Figure 4C shows that  $aG_{NaP}$  was able to restore the high values of  $R_{in}$  associated with the presence of  $I_{NaP}$  (ttx vs  $aG_{NaP}$ , Two way repeated measures ANOVA,  $n = 9$ ). On the other hand,  $ag_{NaP}$  did not change the  $R_{in}$  (Figure 4D). In Figure 4E (right), we compare the current values in the range between -80 and -70 mV for the  $aG_{NaP}$ ,  $ag_{NaP}$  and  $aI_{NaP}$ . Despite that, within this range, the current of the  $ag_{NaP}$  was higher than the current of the  $aG_{NaP}$  and the  $aI_{NaP}$ , only the latter currents were effective influencing  $R_{in}$ , showing that  $R_{in}$  reflects the rate of the change of the currents (i.e. the slope conductance) and not its absolute values (i.e. instantaneous currents).

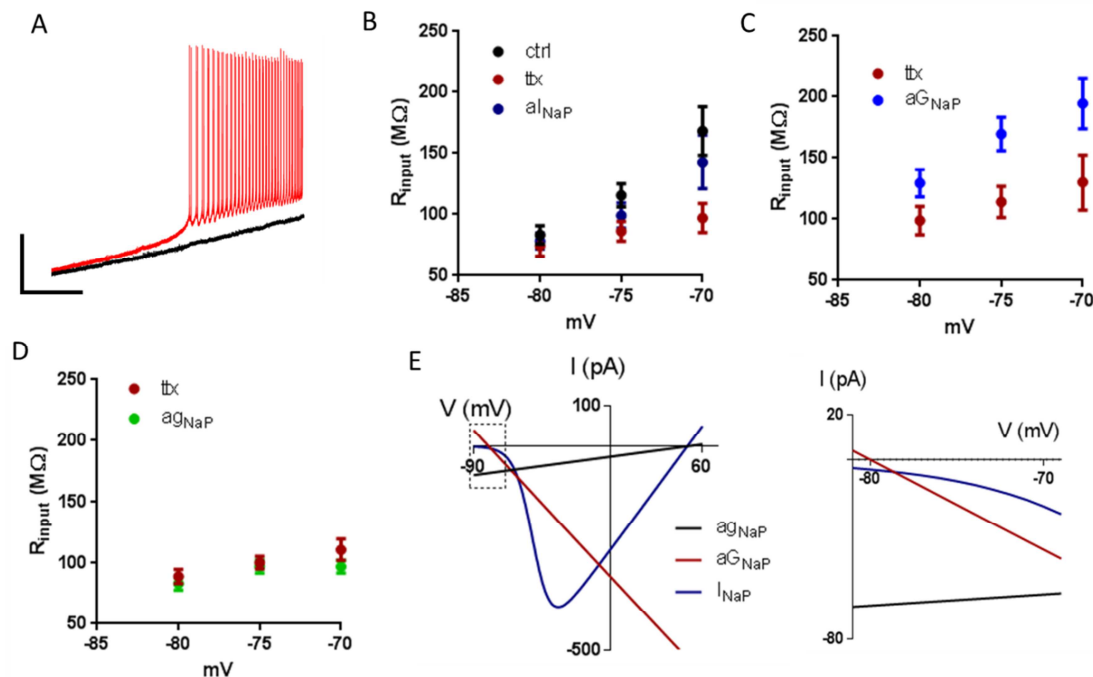

**Fig 4.** A. Ramp recorded in the current-clamp mode for the control case (red) and after the application of TTX (black). B. Voltage dependence of  $R_{in}$  before and after the application of TTX and with the injection of  $aI_{NaP}$  ( $n = 6$ ). C. Voltage dependence of  $R_{in}$  after the application of TTX and with the injection of  $aG_{NaP}$  ( $n = 9$ ). D. Voltage dependence of  $R_{in}$  after the perfusion with TTX and with the injection of  $aG_{NaP}$  ( $n = 8$ ). E.  $I-V$  curves of  $aG_{NaP}$ ,  $aG_{NaP}$  and  $aI_{NaP}$  injected using dynamic-clamp (Left). Expanded plot focusing on the membrane potential region which the  $aG_{NaP}$  was injected ( $V_m > -80$  and  $V_m < -70$  mV) (right). It is noted that all the three currents are depolarizing.

#### Membrane time constant is voltage dependence and is determined by the voltage-dependence of $R_{in}$ .

In accordance to our theoretical prediction and to what was observed by others (Yamada-Hanff et al 2015), we observed that  $\tau_m$  is voltage dependent and increases with depolarization, an effect abolished by TTX application (Figure 5A and Figure 5B, Two way repeated measures ANOVA,  $n = 11$ ). Similarly to what observed with  $R_{in}$ , TTX application decreases significantly the  $\tau_m$  in more depolarized potentials (-75 mV,  $p < 0.05$  Sidak's multiple comparison test). We then tested if applying  $aG_{NaP}$  could increase  $\tau_m$  in the presence of TTX. Figure 5C shows that  $aG_{NaP}$  increases  $\tau_m$  independently of voltage to values similar to  $\tau_m$  measured

without TTX at -75 mV (Two way repeated measures ANOVA,  $n = 10$ ; figure 5C). Accordingly to an effect dependent on the negative slope conductance,  $g_{NaP}$  did not change the  $\tau_m$  (Figure 5D, Two way repeated measures ANOVA,  $n = 11$ ). Similarly, as already discussed above with  $R_{in}$ ,  $aG_{NaP}$  and not  $g_{NaP}$  was effective influencing  $\tau_m$ , showing that  $\tau_m$  reflects the rate of the change of the currents (i.e. the slope conductance) and not its absolute values (i.e. instantaneous currents).

Accordingly to the predicted by the cable theory, the mathematical relation  $\tau_m = C \cdot R_{in}$  must be valid for a passive membrane. However we do not know if for our situation of a membrane containing leak and NaP channels this is still valid. So we correlated the values of  $R_{in}$  and  $\tau_m$  for all the membrane potentials for the control group and observed a positive correlation between  $R_{in}$  and  $\tau_m$  ( $p < 0.0001$ ,  $R^2 = 0.556$   $n = 12$  neurons). The equation slope determined from the linear regression was 196 pF what is in line with the capacitance values determined by others in CA1 pyramidal neurons (Tamagnini et al 2015).

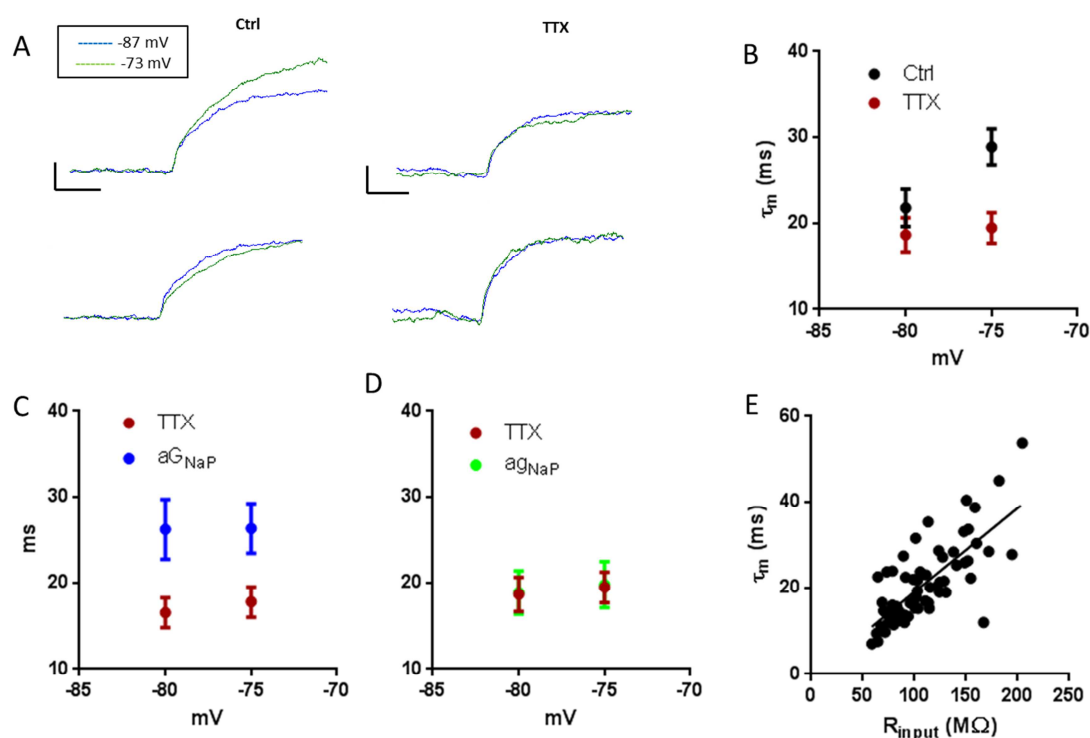

**Fig 5. A. Representatives diagrams of the same neuron, control and TTX. Voltage change increases with depolarization in the control group but not in TTX group (top).  $\tau_m$  increases with depolarization in the control group but not in TTX group (bottom, same traces from top but normalized). The current injected was 20 pA. Bar sizes: vertical: 1 mV, horizontal: 20 ms. B. Voltage dependence of  $\tau_m$  for control and TTX group (n = 11). C. Voltage dependence of  $\tau_m$  after TTX application and with the injection of  $aG_{NaP}$  (n = 10). D. Voltage dependence of  $\tau_m$  after TTX application and with the injection of  $ag_{NaP}$  (n = 11). F. Linear regression of  $R_{in}$  vs  $\tau_m$  for control group for all the membrane potentials.**

### The negative slope conductance explains amplification of EPSPs

We then tested if  $I_{NaP}$  could amplify an artificial EPSP (aEPSP) amplitude and decay time, measuring the amplitude and area of aEPSPs for different membrane potentials before and after TTX application. The aEPSP amplitude is voltage-dependent and increased slightly with depolarization by 5% when comparing -85 with -70 mV. Application of TTX abolished this voltage-dependency. Figure 6A and Figure 6B show that the aEPSP area is also voltage-dependent and increased considerably with depolarization by 30% when comparing -85 with -70 mV. Application of TTX abolished this voltage-dependency confirming the role of  $I_{NaP}$  (Two way repeated measures ANOVA, n = 10).

We then wanted to know if the prolongation of the aEPSP by  $I_{NaP}$  was caused by its negative slope conductance  $G_{NaP}$ . For this we applied an artificial  $G_{NaP}$  in the presence of TTX in order to know if can amplify and prolong the aEPSPs. The injection of  $aG_{NaP}$  increases the EPSP amplitude in a voltage independent manner in accordance to what observed with  $R_{in}$  previously. To quantify the effect of  $aG_{NaP}$  on the decay of the aEPSP, we calculated the area of the normalized aEPSPs. As can be seen in Figure 6C and Figure 6D, the injection of  $aG_{NaP}$  increases the EPSP normalized area by the amplitude in a voltage independent manner (Two way repeated measures ANOVA, n =9). These results strongly suggest that  $I_{NaP}$  EPSP amplification is mainly due to its negative slope conductance.

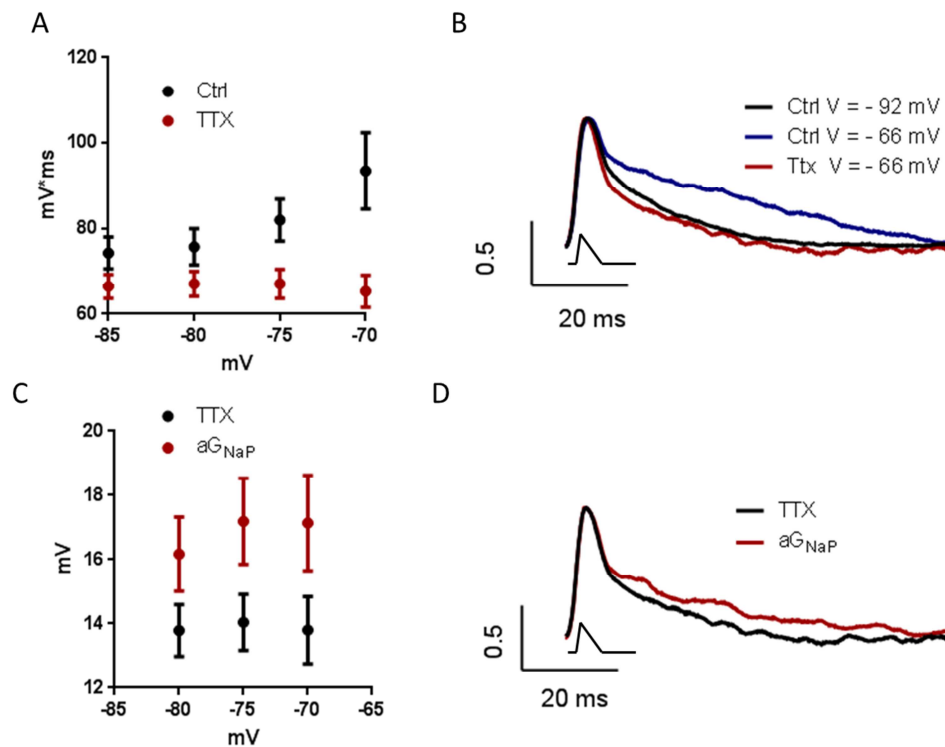

**Fig 6. A.** EPSPs area comparing the control vs TTX. **B.** EPSP representative traces. EPSP normalized by the amplitude for control for depolarized ( $V = -66$  mV) and hyperpolarized membrane potentials ( $V = -92$  mV) and for TTX for depolarized membrane potential ( $V = -66$  mV). aEPSC is drawn below the traces. **C.** EPSPs normalized area by the amplitude comparing TTX vs the injection of aG<sub>NaP</sub>. **D.** EPSP representative traces. EPSP normalized by the amplitude for TTX vs the injection of aG<sub>NaP</sub> for a depolarized membrane potential ( $V = -66$  mV). aEPSC is drawn below the traces.

## DISCUSSION

In this work we developed a new analytical solution of the slope conductance of the non-inactivating voltage dependent currents in order to understand the mechanisms by which  $I_{NaP}$  activation increases  $R_{in}$  and prolongs  $\tau_m$ . Using mathematical, computational and experimental approaches, we established the biophysical mechanism by which a negative slope conductance increases  $R_{in}$  and  $\tau_m$ . Our results show that the amplification of the amplitude and the prolongation of the decay time of subthreshold EPSPs by  $I_{NaP}$  are basically caused by its negative slope conductance, and it is not related to its deactivation kinetics or other voltage-dependent conductance activated by  $I_{NaP}$ . Additionally we showed that  $I_{NaP}$  is well suited for this because of its very fast activation kinetics, which produces an almost instantaneous current, which behaves during its activation phase like a linear negative conductance.

Accordingly to previous observations we observed that under presence of the endogenous  $I_{NaP}$ ,  $R_{in}$  and  $\tau_m$  increases in a voltage dependent manner, an effect abolished by TTX application (Wilson 2005, Haj-Dahmane et al 1996, Yamada-Hanff et al 2013, Fernandez et al 2015, Economo et al 2014, Yamada-Hanff et al 2015, Jacobson et al 2005, Yaron-Jakubovitch et al 2008, Boehlen 2012, Waters et al 2006, Buchanan et al 1992). These previous reports suggested that this paradoxical increase in  $R_{in}$  produced by the activation of NaP current were caused by a negative slope conductance region generated by  $I_{NaP}$ . On the other hand, they were not conclusive about the effect on  $\tau_m$ . Our dynamic clamp experiments showed that injection of a pure negative linear conductance ( $aG_{NaP}$ ) increased the  $R_{in}$  and  $\tau_m$ , validating the hypothesis that the ability for  $I_{NaP}$  to increase  $R_{in}$  and  $\tau_m$  is related to its negative slope conductance. Thus the electrical behavior of  $I_{NaP}$  is sufficient to explain the observed increase of  $R_{in}$  and  $\tau_m$ , and not a result of other conductance activated by  $Na^+$  or other subthreshold conductance.

Using mathematical and computational simulations we determined that because  $I_{NaP}$  has a fast activation/deactivation kinetics, when compared with the cell membrane kinetics,  $I_{NaP}$  reaches its steady state so fast that  $I_{NaP}$  is able to control the  $\tau_m$  via its steady state slope conductance  $G_{NaP}$ . Thus, we believe that the contribution of  $I_{NaP}$  to the  $\tau_m$  is via its negative slope conductance  $G_{NaP}$ . Our computational

simulations showed that  $\tau_m$  is directly proportional to  $R_{in}$ , independently the membrane potential, suggesting that the relation  $\tau_m = C_m * R_{in}$  is valid. This is in agreement to the behavior of passive membranes in accordance with the cable theory, even being  $I_{NaP}$  a voltage-dependent current.

Previous works established that the slope conductance of non-inactivating voltage dependent currents has two terms: a passive and a derivative (Koch 1998, Wessel et al 1999, Ferreira et al 1985). However, it was unknown how much is the contribution of each component to the slope conductance of  $I_{NaP}$ . We found that the derivative term of  $I_{NaP}$   $G_{NI}^{Der}$  is always negative while the passive term  $G_{NI}^{Pas}$  is always positive. We also found that the magnitude of  $G_{NI}^{Der}$  was much bigger than  $G_{NI}^{Pas}$ , resulting in a negative  $G_{NaP}$  mainly dominated by the contribution of its derivative term. In fact,  $G_{NI}^{Der}$  was at least 10 times bigger than  $G_{NI}^{Pas}$ , so more than 90 % of the  $G_{NaP}$  comes from  $G_{NI}^{Der}$  magnitude. This is because the driving force is a multiplicative factor of  $G_{NI}^{Der}$  but not of  $G_{NI}^{Pas}$ , and because the subthreshold membrane potential are distant from the sodium reversal potential (+70 mV), creating a large driving force for sodium (120 mV).

The paradox of blocking  $I_{NaP}$  decreases  $R_{in}$  and  $\tau_m$  is a consequence of the assuming a direct correlation of conductance with permeability. The classical interpretation of the membrane input resistance is based on the assumption that it is inversely related to the conductance (permeability) of the channel. So that the most logical interpretation when the input resistance increases or decreases is that the channel is closed or opened. The definition of the slope conductance is not directly connected with the description of membrane conductance being defined as an increase in the membrane ionic permeability. In order to explain the input resistance and its voltage dependent behavior, the slope conductance is more appropriate than the chord conductance, which has a direct correspondence to the membrane ionic permeability. The  $I_{NaP}$  I-V curve provides a good example of the difference between the slope and chord conductances. The  $I_{NaP}$  slope conductance is negative at subthreshold membrane potentials, but its chord conductance is always positive at every value of membrane potential. The ohmic conductance of the channel can only be obtained by computing the chord conductance at each voltage. The chord conductance, therefore, is most

appropriate for characterizing the ionic permeability of the membrane while the slope conductance reflects an electric property directly affecting the membrane input resistance. Earlier attempts have been made in this direction. Izhikevich (2007) and Hutcheon et al (2000) classified the voltage dependent currents in two categories: amplifying and resonant currents. Amplifying currents (e.g.  $I_{NaP}$ ) exhibit negative slope conductance meanwhile resonant currents (e.g.  $I_h$ ) only exhibit positive slope conductance, affecting the membrane input resistance differentially.

Here, we propose that for  $I_{NaP}$ , it is the slope conductance and not the chord conductance which is more relevant to produce its influence on  $R_{in}$  and  $\tau_m$ . In such paradigm, slope conductances (positive and negative) from each channel (linear and voltage-dependent) is simply added algebraically, and it is this sum that determine  $R_{in}$  and  $\tau_m$ , following a simple mathematical rule:  $R_{in} = 1/\Sigma G$  and  $\tau_m = R_{in} * C$ , (where  $C$  is the membrane capacitance). It is important to highlight that this paradigm is only valid for voltage dependent currents with fast kinetics. From the point of view of this, the anomalous increase of  $R_{in}$  by the activation of the NaP channels is no longer a counterintuitive result, and it is easily explained by an electric circuit as a consequence of positive and negative slope conductances in parallel which can be summed algebraically (Eeckman 2012). Thus, in the near threshold region, where  $I_h$  contributes less than the leak current,  $G_{NaP}$  opposes the positive slope conductance of the leak current (Yamada-Hanff et al 2015), which leads to a decrease of the total positive slope conductance, leading to an increase of the  $R_{in}$  of the neuron.

These concepts can be extended to understand the effect of other ionic currents, besides  $I_{NaP}$ , that also present a negative slope conductance regions, such as some  $Ca^{++}$  voltage dependent channels, NMDA receptors and inward rectifier potassium currents. For instance, the anomalous increase of the  $R_{in}$  in neurons that is observed also during the activation of NMDA receptors, can be explained as a consequence of a negative slope conductance region (Crunelli et al 1984, Moore et al 1995, Sutor et al 1987, MacDonald et al 1982, Koch 1998). In addition, it has been observed a prolongation of the EPSP decay time due to Ca channels opening (Prescott & De Koninck, 2005).



As we observed in our results, the effect of  $I_{NaP}$  on the excitability of the neuron membrane is beyond its effects on the  $R_{in}$  and  $\tau_m$ . For instance, a well-recognized phenomenon is the amplification of the EPSPs and IPSPs by the  $I_{NaP}$  (Stuart et al 1995, Schwindt et al 1995, Stuart 1999, Fricker et al 2000, Hardie et al, 2006). It is well known that  $I_{NaP}$  amplifies the PSPs by increasing their amplitude and prolonging their decay. We observed this same amplification in our experiments. In addition, we observed the same amplification when injected a linear negative conductance after TTX application. These results support the hypotheses that  $I_{NaP}$  amplification of EPSP is mainly due to its negative slope conductance. Since artificial EPSC were injected through the recording pipette placed in the neuron soma, our results suggest that the effects observed in this work on the EPSP amplification are mainly due to the recruitment of sodium channels placed in the soma (Andreasen & Lambert, 1999). Also, our results are in agreement with a recent developed theory called the quasi-active cable approximation that showed that amplifying currents such as  $I_{NaP}$  amplifies the EPSP amplitude and prolong its decay time (Remme & Rinzl 2011).

Thus, our results contribute to the understanding of the mechanisms behind the amplification of PSPs, since increasing of the PSP amplitude and prolonging of their decay can be interpreted as a straightforward result of the increase of the  $R_{in}$  and  $\tau_m$  by  $I_{NaP}$ . For instance, in a previous study, Rotaru et al 2015 reported that cells' input resistance and the cells' membrane time constant shape partially PSP amplitude and time course. More evidence supporting our hypothesis that it is the negative slope conductance of  $I_{NaP}$  that prolongs the EPSP decay is found in Zsiros, V., & Hestrin 2005, that showed that injecting a positive conductance but not a current shortens the prolongation of the EPSP decay enhanced by  $I_{NaP}$ . Furthermore, in an extreme case, Farries et al 2010 showed that  $I_{NaP}$  negative slope conductance can oppose the positive slope conductance due to the other subthreshold currents, thus creating a wide region with zero slope conductance that establishes an infinite time constant and avoid the decay phase of EPSPs.

Computational simulations showed that  $I_{NaP}$  fast activation is necessary to amplify the EPSP amplitude, meanwhile slow activation leads to decrease of the EPSP amplitude. These results can be explained since when the activation is fast,  $G_{NaP}$  influences the dynamics and amplifies the EPSP, meanwhile when the

activation is slow,  $g_{NaP}$  but not  $G_{NaP}$  influences the dynamics and diminishes the EPSP (Remme & Rinzel, 2011). Strikingly, computational simulations also showed that a fast deactivation kinetics ( $\tau_{deact} = 0.1$  ms) prolongs the EPSP decay time when compared with no  $I_{NaP}$ . These results showed that, although counterintuitive, fast  $I_{NaP}$  deactivation kinetics slows down EPSP decay time. These results are in line with experimental data showing that  $I_{NaP}$  kinetics in CA1 pyramidal cells is extremely fast (Carter et al 2012). These results support our claim that it is the  $I_{NaP}$  negative slope conductance and not an slow channel kinetics the cause of the prolongation of the EPSP decay time.

It is believed that activation of inward currents amplify EPSPs by increasing their amplitude and prolonging their decay, while the activation of outward currents may counter the effects of inward currents on EPSP shape (Fricker et al 2000). However, that view in which the classification of the current as inward or outward determines their effects on the PSPs shape has flaws for several reasons. For instance, the activation of the  $h$  current, that is an inward current, decreases EPSPs and IPSPs amplitude and reduces their decay (Magee 1998, Hardie et al, 2006). Moreover,  $I_{NaP}$ , that is also an inward current, amplifies IPSPs (Stuart 1999, Hardie et al, 2006), but none known outward current amplifies IPSPs. Also, a leak current could be inward or outward according to its reversal potential, however leak currents always decrease PSPs amplitude and reduces time decay. Thus, in order to reconcile the experimental data and the theoretical knowledge, we emphasized that a more appropriate view requires the dissociation of two main concepts: 1) the direction of the current flux of the channel, i.e., inward or outward currents and 2) the slope conductance of the channel. Following that line of thought, a current with a negative slope conductance and fast kinetics, it increases the input resistance and amplifies both EPSPs and IPSPs regardless it is an inward or outward current. The opposite happens with a current with a positive slope conductance.

In summary, we propose that the main role of the  $I_{NaP}$  in the membrane excitability is the increase of  $R_{in}$  due to its negative slope conductance. The other phenomena are a consequence of that increase of  $R_{in}$ , such as: increase of  $\tau_m$ , EPSP amplitude amplification and decay time prolongation.

## REFERENCES

- Aman TK, Grieco-Calub TM, Chen C, Rusconi R, Slat EA, Isom LL, Raman IM. (2009) Regulation of persistent Na current by interactions between beta subunits of voltage-gated Na channels. *J Neurosci* 29:2027-42.
- Andreasen, M., & Lambert, J. D. (1999). Somatic amplification of distally generated subthreshold EPSPs in rat hippocampal pyramidal neurones. *The Journal of Physiology*, 519(1), 85-100.
- Boehlen, A., Henneberger, C., Heinemann, U., & Erchova, I. (2012). Contribution of near-threshold currents to intrinsic oscillatory activity in rat medial entorhinal cortex layer II stellate cells. *J Neurophysiol*, 109:445-463.
- Bose, A., Golowasch, J., Guan, Y., & Nadim, F. (2014). The role of linear and voltage-dependent ionic currents in the generation of slow wave oscillations. *J Comput Neurosci*, 37:229-242.
- Buchanan, J. T., Moore, L. E., Hill, R., Wallén, P., & Grillner, S. (1992). Synaptic potentials and transfer functions of lamprey spinal neurons. *Biol Cybernet*, 67:123-131.
- Carter, B. C., Giessel, A. J., Sabatini, B. L., & Bean, B. P. (2012). Transient sodium current at subthreshold voltages: activation by EPSP waveforms. *Neuron*, 75:1081-1093.
- Crill WE (1996) Persistent sodium current in mammalian central neurons. *Annu Rev Physiol*, 58:349–362.
- Crunelli, V. & Mayer, M. L. (1984). Mg<sup>2+</sup> dependence of membrane resistance increases evoked by NMDA in hippocampal neurones. *Brain Res*, 311:392-396.

Dagostin, A. A., Lovell, P. V., Hilscher, M. M., Mello, C. V., & Leão, R. M. (2015). Control of phasic firing by a background leak current in avian forebrain auditory neurons. *Frontiers in cellular neuroscience*, 9.

Dallérac, G., Chever, O., & Rouach, N. (2014). How do astrocytes shape synaptic transmission? Insights from electrophysiology. *Front Cell Neurosci*, 7:159.

Deisz, R. A., Fortin, G., & Zieglgänsberger, W. (1991). Voltage dependence of excitatory postsynaptic potentials of rat neocortical neurons. *J Neurophysiol*, 65:371-382.

Del Negro, C.A., Koshiya, N., Butera, R.J. & Smith, J.C. (2002) Persistent sodium current, membrane properties and bursting behavior of pre-Boltzinger complex inspiratory neurons in vitro. *J. Neurophysiol.*, 88, 2242–2250

Du, Y., Kiyoshi, C. M., Wang, Q., Wang, W., Ma, B., Alford, C. C., Zhong, S., Wan, Q., Chen, H., Lloyd, E. E., Bryan Jr., R. M. & Zhou, M.. (2016). Genetic deletion of TREK-1 or TWIK-1/TREK-1 potassium channels does not alter the basic electrophysiological properties of mature hippocampal astrocytes in situ. *Front Cell Neurosci*, 10:13.

Economo, M. N., Martínez, J. J., & White, J. A. (2014). Membrane potential-dependent integration of synaptic inputs in entorhinal stellate neurons. *Hippocampus*, 24:1493-1505.

Enyedi, P., & Czirják, G. (2010). Molecular background of leak K<sup>+</sup> currents: two-pore domain potassium channels. *Physiol Rev*, 90:559-605.

Farries, M. A., Kita, H., & Wilson, C. J. (2010). Dynamic spike threshold and zero membrane slope conductance shape the response of subthalamic neurons to cortical input. *The Journal of Neuroscience*, 30(39), 13180-13191.

Fernandez, F. R., Malerba, P., & White, J. A. (2015). Non-linear membrane properties in entorhinal cortical stellate cells reduce modulation of input-output responses by voltage fluctuations. *PLoS Comput Biol*, 11:e1004188.

Ferreira, H. G., & Marshall, M. W. (1985). *The Biophysical Basis of Excitability*. Cambridge University Press.

French, C. R., Sah, P., Buckett, K. J., & Gage, P. W. (1990). A voltage-dependent persistent sodium current in mammalian hippocampal neurons. *J Gen Physiol*, 95:, 1139-1157.

Fricker, D., & Miles, R. (2000). EPSP amplification and the precision of spike timing in hippocampal neurons. *Neuron*, 28:559-569.

Ghigliazza, R. M., & Holmes, P. (2004). Minimal models of bursting neurons: How multiple currents, conductances, and timescales affect bifurcation diagrams. *SIAM J App Dyn Syst*, 3:636-670.

Haj-Dahmane, S., & Andrade, R. (1996). Muscarinic activation of a voltage-dependent cation nonselective current in rat association cortex. *J Neurosci*, 16:3848-3861.

Hardie, J. B., & Pearce, R. A. (2006). Active and passive membrane properties and intrinsic kinetics shape synaptic inhibition in hippocampal CA1 pyramidal neurons. *J Neurosci*, 26:8559-8569.

Hutcheon, B., & Yarom, Y. (2000). Resonance, oscillation and the intrinsic frequency preferences of neurons. *TINS*, 23:216-222.

Izhikevich, E. M. (2007). *Dynamical Systems in Neuroscience*. MIT Press.

Jacobson, G. A., Diba, K., Yaron-Jakoubovitch, A., Oz, Y., Koch, C., Segev, I., & Yarom, Y. (2005). Subthreshold voltage noise of rat neocortical pyramidal neurones. *J Physiol*, 564:145-160.

Klink, R., & Alonso, A. (1997). Ionic mechanisms of muscarinic depolarization in entorhinal cortex layer II neurons. *J Neurophysiol*, 77:1829-1843.

Koch, C. (1998). *Biophysics of Computation: Information Processing in Single Neurons*. Oxford University Press.

König, P., Engel, A. K., & Singer, W. (1996). Integrator or coincidence detector? The role of the cortical neuron revisited. *TINS*, 19:130-137.

Leão RM, Kushmerick C, Pinaud R, Renden R, Li GL, Taschenberger H, Spirou G, Levinson SR, von Gersdorff H. (2005) Presynaptic Na<sup>+</sup> channels: locus, development, and recovery from inactivation at a high-fidelity synapse. *J Neurosci*. 25:3724-38.

Leao, R. M., Li, S., Doiron, B., & Tzounopoulos, T. (2012). Diverse levels of an inwardly rectifying potassium conductance generate heterogeneous neuronal behavior in a population of dorsal cochlear nucleus pyramidal neurons. *Journal of neurophysiology*, 107(11), 3008-3019.

MacDonald, J. F., Poriatis, A. V., & Wojtowicz, J. M. (1982). L-Aspartic acid induces a region of negative slope conductance in the current-voltage relationship of cultured spinal cord neurons. *Brain Res*, 237:248-253.

Magee, J. C. (1998). Dendritic hyperpolarization-activated currents modify the integrative properties of hippocampal CA1 pyramidal neurons. *J Neurosci*, 18:7613-7624.

Magistretti J, Ragsdale DS, Alonso A (1999) High conductance sustained single-channel activity responsible for the low-threshold persistent  $\text{Na}^+$  current in entorhinal cortex neurons. *J Neurosci* 19:7334–7341.

Moore, L. E., Buchanan, J. T., & Murphey, C. R. (1995). Localization and interaction of N-methyl-D-aspartate and non-N-methyl-D-aspartate receptors of lamprey spinal neurons. *Biophys J*, 68:96-103.

Moore, L. E., Buchanan, J. R. & Murphey, C. R. (2012). Anomalous increase in membrane impedance of neurons during NMDA activation. In: Eeckman, F. (Ed.). (2012). *Computation in Neurons and Neural Systems*. Springer Science & Business Media. pp. 21-26.

Nisenbaum, E.S. and Wilson, C.J. (1995) Potassium current responsible for inward and outward rectification in rat neostriatal spiny projection neurons. *J Neurosci* 15:4449–4463.

Pennartz, C. M. A., Bierlaagh, M. A., & Geurtsen, A. M. S. (1997). Cellular mechanisms underlying spontaneous firing in rat suprachiasmatic nucleus: involvement of a slowly inactivating component of sodium current. *Journal of Neurophysiology*, 78(4), 1811-1825.

Prescott, S. A., & De Koninck, Y. (2005). Integration time in a subset of spinal lamina I neurons is lengthened by sodium and calcium currents acting synergistically to prolong subthreshold depolarization. *The Journal of neuroscience*, 25(19), 4743-4754.

Raman, I. M., Gustafson, A. E., & Padgett, D. (2000). Ionic currents and spontaneous firing in neurons isolated from the cerebellar nuclei. *The Journal of Neuroscience*, 20(24), 9004-9016.

Qu Y, Curtis R, Lawson D, Gilbride K, Ge P, DiStefano PS, Silos-Santiago I, Catterall WA, Scheuer T (2001) Differential modulation of sodium channel gating and persistent sodium currents by the  $\beta 1$ ,  $\beta 2$ , and  $\beta 3$  subunits. *Mol Cell Neurosci* 18:570–580.

Remme, M. W., & Rinzel, J. (2011). Role of active dendritic conductances in subthreshold input integration. *Journal of computational neuroscience*, 31(1), 13-30.

Rotaru, D. C., Olezene, C., Miyamae, T., Povysheva, N. V., Zaitsev, A. V., Lewis, D. A., & Gonzalez-Burgos, G. (2015). Functional properties of GABA synaptic inputs onto GABA neurons in monkey prefrontal cortex. *Journal of neurophysiology*, 113(6), 1850-1861.

Schwindt, P. C., & Crill, W. E. (1995). Amplification of synaptic current by persistent sodium conductance in apical dendrite of neocortical neurons. *J Neurophysiol*, 74:2220-2224.

Sutor, B., Jordan, W., & Zieglängsberger, W. (1987). Evidence for a magnesium-insensitive membrane resistance increase during NMDA-induced depolarizations in rat neocortical neurons in vitro. *Neuroscience Lett*, 75:317-322.

Stuart, G., & Sakmann, B. (1995). Amplification of EPSPs by axosomatic sodium channels in neocortical pyramidal neurons. *Neuron*, 15:1065-1076.

Stuart, G. (1999). Voltage-activated sodium channels amplify inhibition in neocortical pyramidal neurons. *Nat Neurosci*, 2:144-150.

Stafstrom, C. E., Schwindt, P. C., & Crill, W. E. (1982). Negative slope conductance due to a persistent subthreshold sodium current in cat neocortical neurons in vitro. *Brain Res*, 236:221-226.

Stafstrom, C.E., Schwindt, P.C., Chubb, M.C., and Crill, W.E. (1985). Properties of persistent sodium conductance and calcium conductance of layer V neurons from cat sensorimotor cortex *in vitro*. *J Neurophysiol*, 53:153-170.



Stafstrom, C. E. (2007). Persistent sodium current and its role in epilepsy. *Epilepsy Currents*, 7(1), 15-22.

Surges, R., Freiman, T. M., & Feuerstein, T. J. (2004). Input resistance is voltage dependent due to activation of Ih channels in rat CA1 pyramidal cells. *J Neurosci Res*, 76: 475-480.

Tamagnini, F., Novelia, J., Kerrigan, T. L., Brown, J. T., Tsaneva-Atanasova, K., & Randall, A. D. (2015). Altered intrinsic excitability of hippocampal CA1 pyramidal neurons in aged PDAPP mice. *Frontiers in cellular neuroscience*, 9.

Thomson, A. M., Girdlestone, D., & West, D. C. (1988). Voltage-dependent currents prolong single-axon postsynaptic potentials in layer III pyramidal neurons in rat neocortical slices. *J Neurophysiol*, 60:1896-1907.

Waters, J., & Helmchen, F. (2006). Background synaptic activity is sparse in neocortex. *J Neurosci*, 26:8267-8277.

Wessel, R., Kristan, W. B., & Kleinfeld, D. (1999). Supralinear summation of synaptic inputs by an invertebrate neuron: dendritic gain is mediated by an “inward rectifier” K<sup>+</sup> current. *J Neurosci*, 19:5875-5888.

Wilson, C. J. (2005). The mechanism of intrinsic amplification of hyperpolarizations and spontaneous bursting in striatal cholinergic interneurons. *Neuron*, 45:575-585.

Yamada-Hanff, J., & Bean, B. P. (2013). Persistent sodium current drives conditional pacemaking in CA1 pyramidal neurons under muscarinic stimulation. *J Neurosci*, 33:15011-15021.

Yamada-Hanff, J., & Bean, B. P. (2015). Activation of Ih and TTX-sensitive sodium current at subthreshold voltages during CA1 pyramidal neuron firing. *J Neurophysiol*, 114:2376-2389.

Yaron-Jakoubovitch, A., Jacobson, G. A., Koch, C., Segev, I., & Yarom, Y. (2008). A paradoxical isopotentiality: a spatially uniform noise spectrum in neocortical pyramidal cells. *Front Cell Neurosci*, 2:3.

Zsiros, V., & Hestrin, S. (2005). Background synaptic conductance and precision of EPSP-spike coupling at pyramidal cells. *Journal of neurophysiology*, 93(6), 3248-3256.
